# Supplementary material for: A unique [Sb6O2S13]12−finite chain in oxychalcogenide Ba6Sb6O2S13leading to ultra-low thermal conductivity and giant birefringence
Source: Royal Society of Chemistry journal article supplement (doi:10.1039/d3qi00850a), 2023-01-01
Supplement: d3qi00850a1.pdf [file d3qi00850a1.pdf]

## Electronic Supplementary Information (ESI)

# Unique $[\text{Sb}_6\text{O}_2\text{S}_{13}]^{12-}$ finite chain in oxychalcogenide $\text{Ba}_6\text{Sb}_6\text{O}_2\text{S}_{13}$ leading to ultra-low thermal conductivity and giant birefringence

Yong-Fang Shi,<sup>a,b</sup> Sheng-Hua Zhou,<sup>a,b,c</sup> Peng-Fei Liu,<sup>d</sup> Xin-Tao Wu,<sup>a,b</sup> Hua Lin,<sup>\*,a,b</sup> and Qi-Long Zhu<sup>\*,a,b</sup>

<sup>a</sup>State Key Laboratory of Structural Chemistry, Fujian Institute of Research on the Structure of Matter, Chinese Academy of Sciences, Fuzhou 350002, China

<sup>b</sup>Fujian Science & Technology Innovation Laboratory for Optoelectronic Information of China, Fuzhou 350002, China

<sup>c</sup>University of Chinese Academy of Sciences, Beijing 100049, China

<sup>d</sup>Spallation Neutron Source Science Center, Institute of High Energy Physics, Chinese Academy of Sciences, Dongguan 523803, China

\*E-mail: [linhua@fjirsm.ac.cn](mailto:linhua@fjirsm.ac.cn) and [qlzhu@fjirsm.ac.cn](mailto:qlzhu@fjirsm.ac.cn).

## Electronic Supplementary Information Index

### 1. Experimental Section

#### 1.1 Materials and Instruments

#### 1.2 Synthesis of $\text{Ba}_6\text{Sb}_6\text{O}_2\text{S}_{13}$

#### 1.3 Single-Crystal Structure Characterizations

### 2. Computational Details

### 3. Figures and Tables

**Figure S1.** (a) Coordination environment of Ba atoms including bond distances in the  $\text{Ba}_6\text{Sb}_6\text{O}_2\text{S}_{13}$ .

**Figure S2.** Energy-dispersive X-ray spectroscopy analysis of  $\text{Ba}_6\text{Sb}_6\text{O}_2\text{S}_{13}$ .

**Figure S3.** The first Brillouin zone with high symmetry points (red) in  $\text{Ba}_6\text{Sb}_6\text{O}_2\text{S}_{13}$ .

**Figure S4.** IR transmittance spectra of  $\text{Ba}_6\text{Sb}_6\text{O}_2\text{S}_{13}$ .

**Figure S5.** Electron localization function diagram of  $\text{Ba}_6\text{Sb}_6\text{O}_2\text{S}_{13}$ .

**Figure S6.** (a) Photograph of the title crystals and (b) powder XRD patterns of  $\text{Ba}_6\text{Sb}_6\text{O}_2\text{S}_{13}$  after 6 months.

**Table S1.** Selected bond lengths (Å) for Ba<sub>6</sub>Sb<sub>6</sub>O<sub>2</sub>S<sub>13</sub>.

**Table S2.** Structural features of Sb-based oxychalcogenides.

#### **4. References**

## **1. Experimental Section**

### **1.1 Materials and Instruments**

All reagents used in the present experiments were purchased from commercial sources and directly used without further purification. All weighing processes were completed in an anhydrous and oxygen-free glove box. The semi-quantitative energy dispersive X-ray (EDX, Oxford INCA) spectra were measured with a field emission scanning electron microscope (FESEM, JSM6700F). Powder X-ray diffraction (PXRD) analysis was carried out in a Rigaku Mini-Flex II powder diffractometer (Cu- $K_{\alpha}$ ,  $\lambda = 1.5418 \text{ \AA}$ ). UV-vis-NIR absorption measurement was performed in the region of 200–2500 nm at room temperature using an UV-vis-NIR spectrometer (Perkin-Elmer Lambda 950). The reflectance spectrum of the  $\text{BaSO}_4$  powder was collected as the baseline and the diffuse reflectance data were converted to absorbance internally by the instrument by use of the Kubelka-Munk function.<sup>1</sup> The thermal stability analyses were measured on a NETZSCH STA 449C simultaneous analyser. The thermal conductivity were measured by laser flash techniques with a Netzsch LFA 457 system and calculated using the formula  $\kappa = D \times C_p \times d$ , where  $D$  was the measured thermal diffusivity,  $C_p$  was the heat capacity estimated using the Dulong-Petit model ( $C_p = 3nR$ , where  $n$  is the number of atoms per formula unit and  $R$  is the gas constant) and  $d$  was the sample density.<sup>2</sup> The uncertainty of the thermal conductivity  $k$  is estimated to be within 5 %, considering the uncertainties for  $D$ ,  $C_p$  and  $d$ .

## 1.2 Synthesis of $\text{Ba}_6\text{Sb}_6\text{O}_2\text{S}_{13}$

The starting reagents BaS (99.7 %),  $\text{Sb}_2\text{O}_3$  (99 %), and  $\text{Sb}_2\text{S}_3$  (99 %) purchased from Aladdin China (Shanghai) Co., Ltd. were used as obtained.

After numerous explorations on the experimental conditions including starting reactant, loading ratio, annealing temperature, the optimal synthesis condition of  $\text{Ba}_6\text{Sb}_6\text{O}_2\text{S}_{13}$  was established as follows: a stoichiometric mixture of 32 mmol of BaS, 11 mmol of  $\text{Sb}_2\text{O}_3$ , and 5 mmol of  $\text{Sb}_2\text{S}_3$  in a carbonized silica crucible. The tube was then evacuated to a vacuum of  $10^{-2}$  Pa atmosphere and sealed. Afterward, the sample was heated in a resistance furnace to 973 K over 24 h and kept at that temperature for 72 h, and subsequently cooled to 773 K at 2.5 K/h before switching off the furnace. Red-black crystals were obtained and the yield is about 95% (based on Sb). The samples were stable in air for more than 6 months, which can be verified by the analysis results of both single-crystal and powder XRD (Figure S6).

Energy-dispersive X-ray analysis of  $\text{Ba}_6\text{Sb}_6\text{O}_2\text{S}_{13}$  was shown in Figure S2. The EDX results confirmed the presence of Ba, Sb, O and S in an approximate molar ratio of  $\text{Ba}_{6.0(5)}\text{Sb}_{6.1(3)}\text{O}_{1.9(5)}\text{S}_{13.5(6)}$ , which is in good agreement with the refined compositions obtained from the single-crystal XRD data. Compound  $\text{Ba}_6\text{Sb}_6\text{O}_2\text{S}_{13}$  was characterized by powder XRD and the experimental XRD patterns of the title compound was agreed well with the simulated patterns (Figure 3b).

The as-synthesized polycrystalline samples were ground into a fine powder and hot-pressed pellet at 773 K for 60 min under an axial compressive stress of 100 MPa in vacuum. A highly dense disk (more than 95% theoretical density), with dimensions

of 10 mm in diameter and approximately 1 mm in thickness, was obtained. Graphite was evenly sprayed on both sides of the disk for the purpose of measuring thermal conductivity.

### **1.3 Single-Crystal Structure Characterizations**

Suitable single crystal of the title compound was mounted on the glass fibers. Diffraction data were collected by an Oxford Xcalibur (Atlas Gemini ultra) diffractometer with a graphite-monochromated Mo-K $\alpha$  radiation ( $\lambda = 0.71073$  Å) at room temperature. The absorption correction was based on the multi-scan method.<sup>3</sup> The structures were solved by the direct methods and refined by the full-matrix least-squares fitting on  $F^2$  using the *SHELXL-2014* software package.<sup>4</sup> The assignments of Ba, Sb, O, and S were determined on the basis of the interatomic distances, coordination environments and relative displacement parameters. The structure was verified using the *ADDSYM* algorithm from the program *PLATON*.<sup>5</sup> The final atomic positions were standardized with the *STRUCTURE TIDY* program.<sup>6</sup> Crystal data and refinement details are summarized in Tables 1-2, the selected bond lengths are listed in Table S1. CCDC number: 2247687.

### **2. Computational Details**

Crystallographic data determined by single-crystal XRD were used for theoretical calculations of their electronic band structures. The density functional theory (DFT) calculations have been performed using the *Vienna ab initio simulation package* (VASP)<sup>7-9</sup> with the Perdew-Burke-Ernzerhof (PBE)<sup>10</sup> exchange correlation functional. The projected augmented wave (PAW)<sup>11</sup> potentials have been used to treat the ion-

electron interactions. A  $\Gamma$ -centered  $7\times7\times9$  Monkhorst-Pack grid for the Brillouin zone<sup>12</sup> sampling and a cutoff energy of 750 eV for the plane wave expansion were found to get convergent lattice parameters and self-consistent energies.

### 3. Figures and Tables

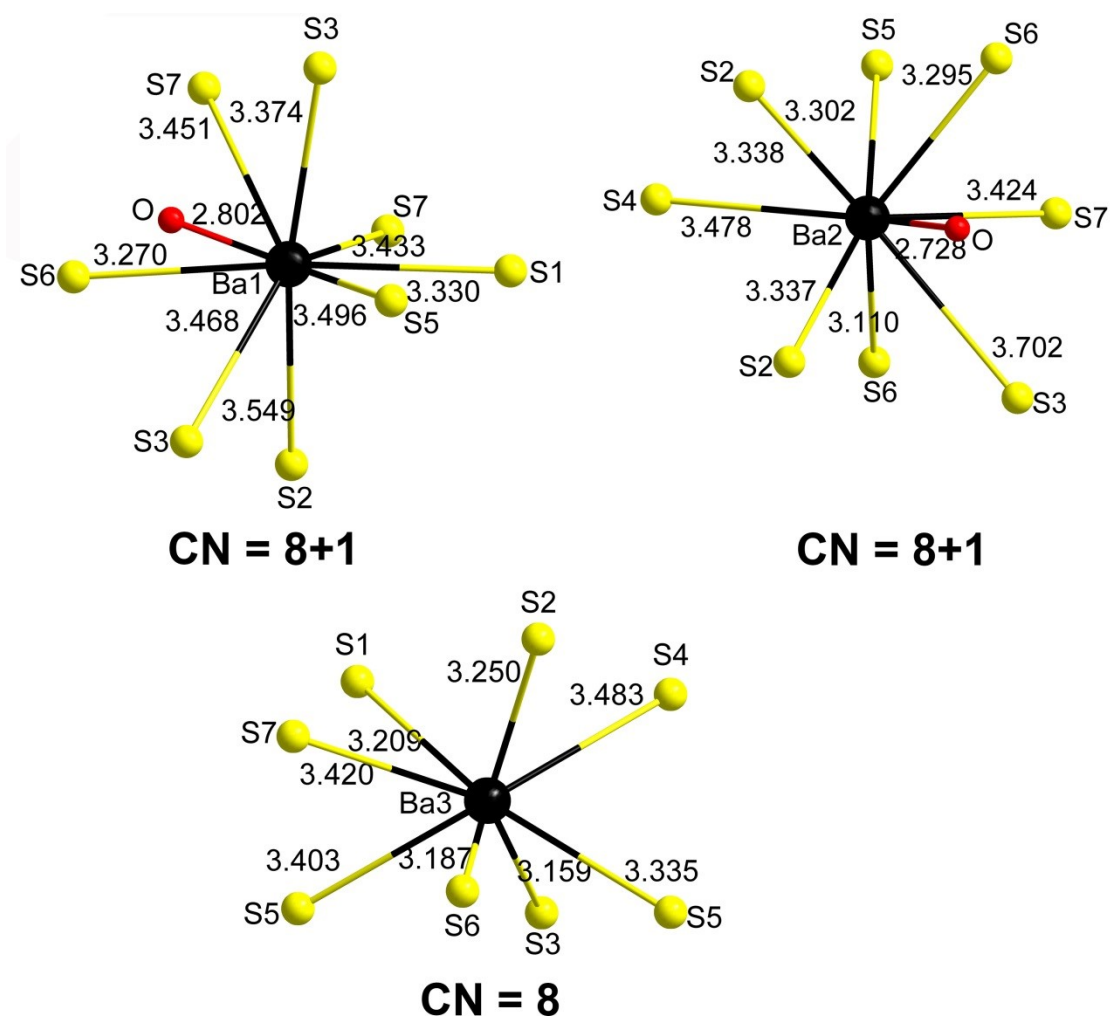

**Figure S1.** (a) Coordination environment of Ba atoms including bond distances in the  $\text{Ba}_6\text{Sb}_6\text{O}_2\text{S}_{13}$ .

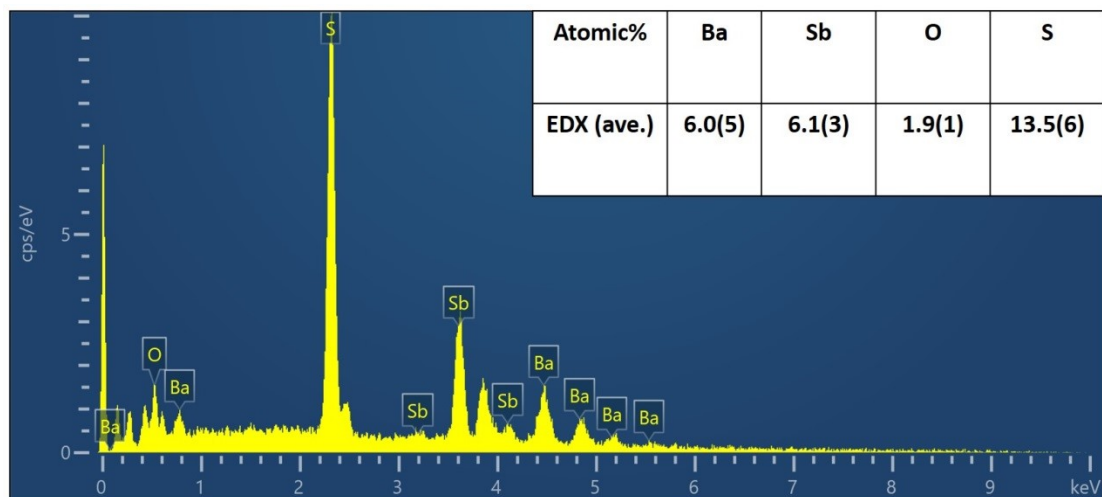

**Figure S2.** Energy-dispersive X-ray spectroscopy analysis of  $\text{Ba}_6\text{Sb}_6\text{O}_2\text{S}_{13}$ .

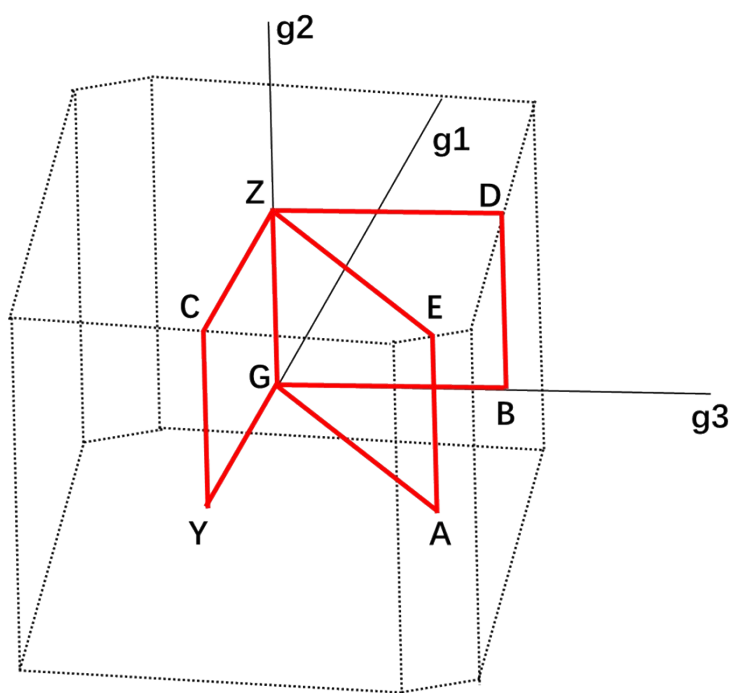

**Figure S3.** The first Brillouin zone with high symmetry points (red) in  $\text{Ba}_6\text{Sb}_6\text{O}_2\text{S}_{13}$ .



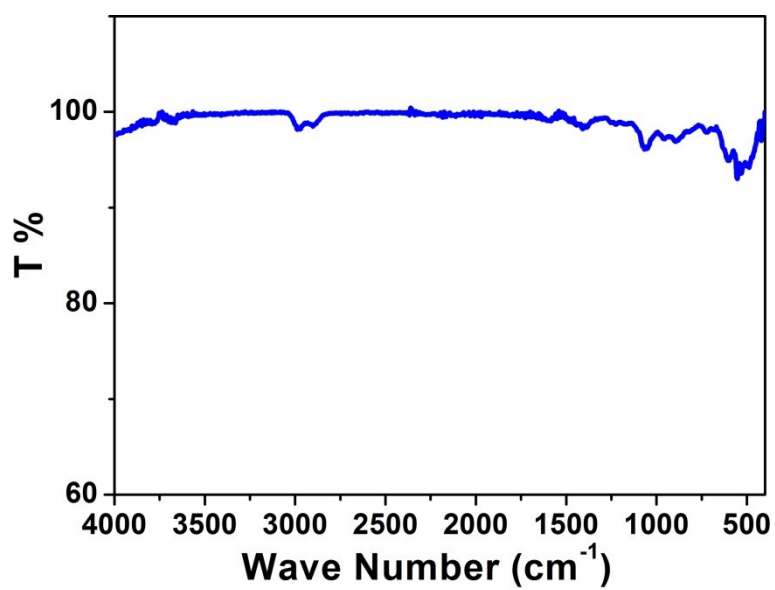

**Figure S4.** IR transmittance spectra of  $\text{Ba}_6\text{Sb}_6\text{O}_2\text{S}_{13}$ .

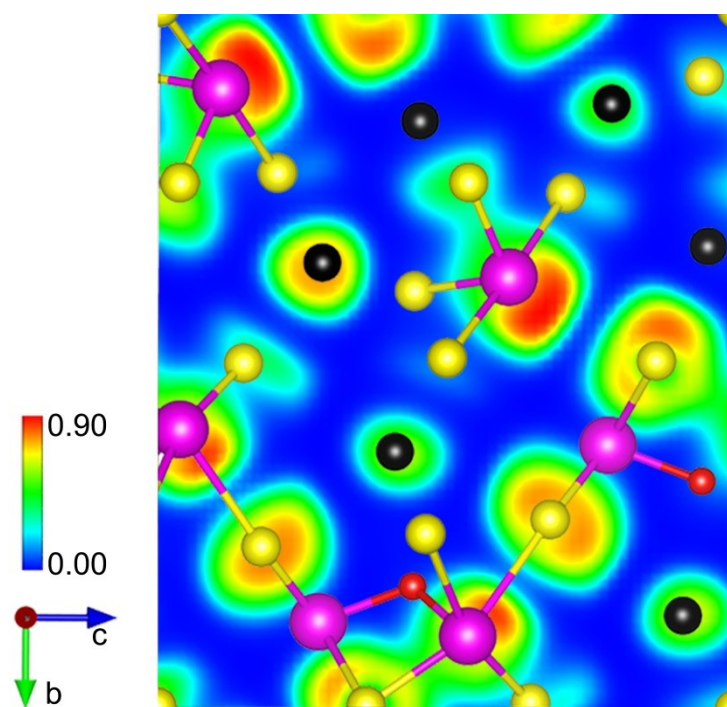

**Figure S5.** Electron localization function diagram of  $\text{Ba}_6\text{Sb}_6\text{O}_2\text{S}_{13}$ .

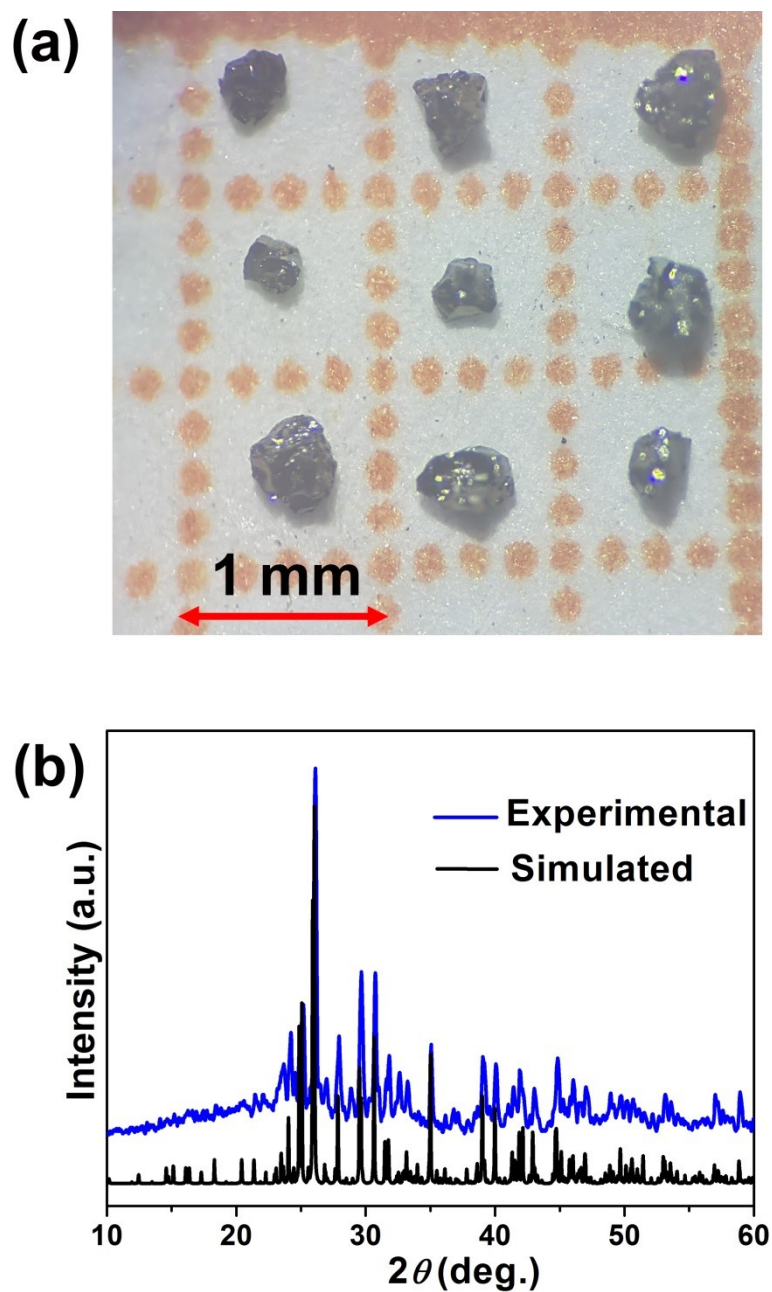

**Figure S6.** (a) Photograph of the title crystals and (b) powder XRD patterns of Ba<sub>6</sub>Sb<sub>6</sub>O<sub>2</sub>S<sub>13</sub> after 6 months.

**Table S1.** Selected bond lengths (Å) for Ba<sub>6</sub>Sb<sub>6</sub>O<sub>2</sub>S<sub>13</sub>.

|        |           |             |           |
|--------|-----------|-------------|-----------|
| Sb1–O  | 2.086(4)  | ∠ O–Sb1–S2  | 94.11(12) |
| Sb1–S2 | 2.448(2)  | ∠ O–Sb1–S4  | 85.31(13) |
| Sb1–S4 | 2.4750(2) | ∠ S2–Sb1–S4 | 100.59(6) |
| Sb2–S1 | 2.7958(5) | ∠ S5–Sb2–S1 | 86.56(4)  |
| Sb2–S5 | 2.428(2)  | ∠ S5–Sb2–S6 | 89.07(5)  |
| Sb2–S6 | 2.769(2)  | ∠ S6–Sb2–S1 | 175.31(4) |
| Sb2–S7 | 2.393(2)  | ∠ S7–Sb2–S1 | 88.23(4)  |
| Sb3–O  | 2.022(4)  | ∠ S7–Sb2–S5 | 97.78(6)  |
| Sb3–S3 | 2.393(2)  | ∠ S7–Sb2–S3 | 90.69(6)  |
| Sb3–S4 | 2.858(2)  | ∠ O–Sb3–S3  | 98.65(13) |
| Sb2–S6 | 2.837(2)  | ∠ O–Sb3–S4  | 76.87(13) |
|        |           | ∠ O–Sb3–S6  | 77.08(13) |
|        |           | ∠ S3–Sb3–S4 | 96.39(5)  |
|        |           | ∠ S3–Sb3–S6 | 88.89(6)  |
|        |           | ∠ S4–Sb3–S6 | 153.92(5) |

**Table S2.** Structural features of Sb-based oxychalcogenides.

| Compounds                                                                          | Space group                                | crystal system | Q-to-O ratio  | BBUs                                                                                 | Structural dimension | Ref.                |
|------------------------------------------------------------------------------------|--------------------------------------------|----------------|---------------|--------------------------------------------------------------------------------------|----------------------|---------------------|
| La <sub>6</sub> Sb <sub>4</sub> O <sub>12</sub> S <sub>3</sub>                     | <i>I</i> 4 <sub>1</sub> / <i>amd</i> (141) | orthorhombic   | 0.25          | [SbO <sub>3</sub> ]                                                                  | 0D                   | 13                  |
| Ba <sub>6</sub> Sb <sub>6</sub> O <sub>2</sub> S <sub>13</sub>                     | <i>P</i> 2 <sub>1</sub> / <i>c</i> (14)    | monoclinic     | 6.5           | [SbOS <sub>2</sub> ], [SbOS <sub>3</sub> ], [SbS <sub>4</sub> ]                      | 0D                   | This work           |
| Ba <sub>2</sub> Sb <sub>2</sub> O <sub>2</sub> S <sub>3</sub>                      | <i>C</i> 2/ <i>c</i> (15 )                 |                | 1.5           | [SbOS <sub>2</sub> ]                                                                 | 0D                   | 14                  |
| Ca <sub>2</sub> Sb <sub>2</sub> O <sub>2</sub> S <sub>3</sub>                      |                                            |                | 1.5           | [SbOS <sub>4</sub> ]                                                                 | 1D                   | 14                  |
| Sr <sub>2</sub> Sb <sub>2</sub> O <sub>2</sub> Se <sub>3</sub>                     |                                            |                | 1.5           | [SbOSe <sub>4</sub> ]                                                                | 1D                   | 15                  |
| Sr <sub>6</sub> Cd <sub>2</sub> Sb <sub>6</sub> O <sub>7</sub> Se <sub>10</sub>    | <i>Cm</i> (8)                              |                | 1.43          | [SbO <sub>4</sub> ], [SbOSe <sub>4</sub> ], [SbSe <sub>5</sub> ]                     | 1D+2D                | 16                  |
| Sr <sub>6</sub> Cd <sub>2</sub> Sb <sub>6</sub> O <sub>7</sub> S <sub>10</sub>     |                                            |                | 1.43          | [SbO <sub>4</sub> ], [SbOS <sub>4</sub> ], [SbS <sub>5</sub> ]                       | 1D+2D                | 17                  |
| Pb <sub>13.43</sub> Sb <sub>15.57</sub> O <sub>0.18</sub> S <sub>36</sub>          | <i>C</i> 2/ <i>m</i> (12)                  |                | 200           | [SbS <sub>5</sub> ], [SbS <sub>3</sub> ], [SbOS <sub>3</sub> ], [SbO <sub>3</sub> S] | 2D                   | 18                  |
| Pb <sub>14</sub> Sb <sub>30</sub> O <sub>5</sub> S <sub>54</sub>                   | <i>P</i> 2 <sub>1</sub> / <i>m</i> (11)    |                | 10.8          | [SbS <sub>5</sub> ], [SbS <sub>3</sub> ], [SbO <sub>2</sub> S <sub>2</sub> ]         |                      | 19                  |
| CeSbOS <sub>2</sub>                                                                |                                            |                | 2             | [SbS <sub>3</sub> ]                                                                  |                      | 20                  |
| SrCuSbOS <sub>2</sub>                                                              |                                            |                | 2             | [SbOS <sub>4</sub> ]                                                                 |                      | 21                  |
| SrCuSbOSe <sub>2</sub>                                                             |                                            |                | 2             | [SbOSe <sub>4</sub> ]                                                                |                      | 22                  |
| Sr <sub>3.5</sub> Pb <sub>2.5</sub> Sb <sub>6</sub> O <sub>5</sub> S <sub>10</sub> |                                            |                | 2             | [SbO <sub>2</sub> S <sub>2</sub> ]                                                   |                      | 23                  |
| Sr <sub>4</sub> Pb <sub>1.5</sub> Sb <sub>5</sub> O <sub>5</sub> Se <sub>8</sub>   |                                            |                | <i>Cm</i> (8) | 1.6                                                                                  |                      | [SbO <sub>3</sub> ] |
| CaSb <sub>10</sub> O <sub>10</sub> S <sub>6</sub>                                  | <i>C</i> 2/ <i>c</i> (15)                  |                | 0.6           | [SbO <sub>3</sub> ], [SbOS <sub>2</sub> ], [SbS <sub>3</sub> ], [SbO <sub>4</sub> ]  | 3D                   | 25                  |

#### 4. References

- (1) G. Kortüm, *Reflectance Spectroscopy*; Springer-Verlag: NewYork, 1969.
- (2) K. A. Borup, J. D. Boor, H. Wang, F. Drymiotis, F. Gascoin, X. Shi, L. D. Chen, M. I. Fedorov, E. Müller, B. B. Iversen and G. J. Snyder, Measuring thermoelectric transport properties of materials. *Energy Environ. Sci.*, 2015, **8**, 423–435.
- (3) *CrystalClear* Version 1.3.5; Rigaku Corp.: Woodlands, TX, 1999.
- (4) Sheldrick, G. M. A short history of SHELX, *Acta Crystallogr., Sect. A: Found. Crystallogr.*, 2008, 112–122.
- (5) A. L. Spek, Single-crystal structure validation with the program PLATON, *J. Appl. Cryst.*, 2003, **36**, 7–13.
- (6) L. M. Gelato and E. J. Parthe, STRUCTURE TIDY—a computer program to standardize crystal structure data, *Appl. Crystallogr.*, 1987, **20**, 139–143.
- (7) G. Kresse, VASP, 5.3.5; <http://cms.mpi.univie.ac.at/vasp/vasp/vasp.html>.
- (8) G. Kresse and J. Furthmuller, Efficient iterative schemes for ab initio total-energy calculations using a plane-wave basis set, *Phys. Rev. B: Condens. Matter*, 1996, **54**, 11169–11186.
- (9) G. Kresse and D. Joubert, From ultrasoft pseudopotentials to the projector augmented-wave method, *Phys. Rev. B: Condens. Matter*, 1999, **59**, 1758–1775.
- (10) J. P. Perdew, K. Burke and M. Ernzerhof, Generalized gradient approximation made simple, *Phys. Rev. Lett.*, 1996, **77**, 3865–3868.
- (11) P. E. Blochl, Projector augmented-wave method, *Phys. Rev. B: Condens. Matter*, 1994, **50**, 17953–17979.

- (12) D. J. Chadi, Special points for Brillouin-zone integrations. *Phys. Rev. B: Condens. Matter*, 1976, **16**, 1746–1747.
- (13) W. W. So, A. LaCour, V. O. Aliev and P. K. Dorhout, Synthesis and characterization of a new quaternary lanthanum oxythioantimonite:  $\text{La}_6\text{Sb}_4\text{O}_{12}\text{S}_3$ . *J. Alloys Compd.*, 2004, **374**, 234–239.
- (14) R. Wang, Y. Zhao, X. Zhang and F. Huang, Structural dimension modulation in a new oxysulfide system of  $\text{Ae}_2\text{Sb}_2\text{O}_2\text{S}_3$  (Ae = Ca and Ba). *Inorg. Chem. Front.*, 2022, **9**, 3552–3558.
- (15) J. R. Panella, J. Chamorro and T. M. McQueen, Synthesis and Structure of Three New Oxychalcogenides:  $\text{A}_2\text{O}_2\text{Bi}_2\text{Se}_3$  (A = Sr, Ba) and  $\text{Sr}_2\text{O}_2\text{Sb}_2\text{Se}_3$ . *Chem. Mater.*, 2016, **28**, 890–895.
- (16) R. Wang, F. Wang, X. Zhang, X. Feng, C. Zhao, K. Bu, Z. Zhang, T. Zhai and F. Q. Huang, Improved Polarization in the  $\text{Sr}_6\text{Cd}_2\text{Sb}_6\text{O}_7\text{Se}_{10}$  Oxyselenide through Design of Lateral Sublattices for Efficient Photoelectric Conversion. *Angew. Chem. Int. Ed.* 2022, **61**, e202206816.
- (17) R. Wang, F. Liang, F. Wang, Y. Guo, X. Zhang, Y. Xiao, K. Bu, Z. Lin, J. Yao, T. Zhai and F. Q. Huang,  $\text{Sr}_6\text{Cd}_2\text{Sb}_6\text{O}_7\text{S}_{10}$ : Strong SHG Response Activated by Highly Polarizable Sb/O/S Groups. *Angew. Chem. Int. Ed.*, 2019, **58**, 8078–8081.
- (18) D. Topa, J. Sejkora, E. Makovicky, J. Prsek, D. Ozdin, H. Putz, H. Dittrich and S. Karup-Moller,  $\text{Pb}_{15-2x}\text{Sb}_{14+2x}\text{S}_{36}\text{O}_x$  (x similar to 0.2), a new sulphosalt species from the Low Tatra Mountains, Western Carpathians, Slovakia. *Eur. J. Mineral.*, 2012, **24**, 727–740.

- (19) Y. Moelo, A. Meerschaut, P. Orlandi and P. Palvadeau, Lead-antimony sulfosalts from Tuscany (Italy): II - Crystal structure of scainiite,  $\text{Pb}_{14}\text{Sb}_{30}\text{S}_{54}\text{O}_5$ , an expanded monoclinic derivative of  $\text{Ba}_{12}\text{Bi}_{24}\text{S}_{48}$  hexagonal sub-type (zinkenite group). *Eur. J. Mineral.*, 2000, **12**, 835–846.
- (20) M. Nagao, M. Tanaka, R. Matsumoto, H. Tanaka, S. Watauchi, Y. Takano and I. Tanaka, Growth and Structure of  $\text{Ce}(\text{O},\text{F})\text{SbS}_2$  Single Crystals. *Cryst. Growth Des.*, 2016, **16**, 3037–3042.
- (21) K. Bu, M. Luo, R. Wang, X. Zhang, J. He, D. Wang, W. Zhao and F. Q. Huang, Enhanced Photoelectric  $\text{SrOCuSbS}_2$  of a  $[\text{SrO}]$ -Intercalated  $\text{CuSbS}_2$  Structure. *Inorg. Chem.*, 2019, **58**, 69–72.
- (22) K. Bu, J. Huang, M. Luo, M. Guan, C. Zheng, J. Pan, X. Zhang, S. Wang, W. Zhao, X. Shi, L. Xu and F.Q. Huang, Observation of High Seebeck Coefficient and Low Thermal Conductivity in New  $[\text{SrO}]$ -intercalated  $\text{CuSbSe}_2$  Compound. *Chem. Mater.*, 2018, **30**, 5539–5543.
- (23) R. Wang, K. Bu, X. Zhang, Y. Gu, Y. Xiao, Z. Zhan and F. Q. Huang, A Novel Two-Dimensional Oxysulfide  $\text{Sr}_{3.5}\text{Pb}_{2.5}\text{Sb}_6\text{O}_5\text{S}_{10}$ : Synthesis, Crystal Structure, and Photoelectric Properties. *J. Mater. Chem. C*, 2020, **8**, 11018–11021.
- (24) Y. Wang, M. Luo, P. Zhao, X. Che, Y. Cao and F. Q. Huang,  $\text{Sr}_4\text{Pb}_{1.5}\text{Sb}_5\text{O}_5\text{Se}_8$ : a new mid-infrared nonlinear optical material with a moderate SHG response. *CrystEngComm*, 2020, **22**, 3526–3530.
- (25) I. Nakai, K. Koto, K. Nagashima and N. Morimoto, The crystal structure of sarabauite  $\text{CaSb}_{10}\text{O}_{10}\text{S}_6$ , a new oxide sulfide mineral. *Chem. Letter.*, 1977, 275–276.
